# Supplementary material for: The REPRISE project: protocol for an evaluation of REProducibility and Replicability In Syntheses of Evidence
Source: PubMed Central journal article supplement (PMC8052676; doi:10.1186/s13643-021-01670-0), 2021-04-16
Supplement: 13643_2021_1670_MOESM1_ESM.pdf [file 13643_2021_1670_MOESM1_ESM.pdf]

**Supplementary Material to:**

**The REPRISE project: protocol for an evaluation of REProducibility and Replicability In Syntheses of Evidence**

Matthew J Page\*, David Moher, Fiona M Fidler, Julian PT Higgins, Sue E Brennan, Neal R Haddaway, Daniel G Hamilton, Raju Kanukula, Sathya Karunanathan, Lara J Maxwell, Steve McDonald, Shinichi Nakagawa, David Nunan, Peter Tugwell, Vivian A Welch, Joanne E McKenzie

**\*Correspondence to:** Dr. Matthew Page, School of Public Health and Preventive Medicine, Monash University, 553 St Kilda Road, Melbourne, Victoria, 3004, Australia. Email address:

[matthew.page@monash.edu](mailto:matthew.page@monash.edu)

## **Supplement 1: Search strategies**

Searches run Thursday 3 December 2020

### **PubMed**

(meta-analysis[PT] OR meta-analysis[TI] OR systematic[sb]) AND 2020/11/02:2020/12/02[EDAT]

### **Science Citation Index Expanded (SCI-EXPANDED) and Social Sciences Citation Index (SSCI) via Web of Science**

(TI=meta-analysis OR AB=meta-analysis OR TS=meta-analysis OR TI="systematic review" OR AB="systematic review" OR TS="systematic review") AND **LANGUAGE:** (English) AND **DOCUMENT TYPES:** (Article OR Review)

*Indexes=SCI-EXPANDED, SSCI; Timespan=Last 4 weeks*

### **Scopus via Elsevier**

TITLE("meta-analysis" OR "systematic review") AND ORIG-LOAD-DATE > 1604275200 AND ORIG-LOAD-DATE < 1606867200 AND (LIMIT-TO(DOCTYPE, "ar") OR LIMIT-TO(DOCTYPE, "re"))

### **Education Collection via ProQuest (added in 30 last days)**

MAINSUBJECT.EXACT.EXPLODE("Meta Analysis") OR ab(meta-analysis OR systematic review) OR ti(meta-analysis OR systematic review)
